# Supplementary material for: Deconvolution of the Cellular Force-Generating Subsystems that Govern Cytokinesis Furrow Ingression
Source: PubMed Central journal article supplement (PMC3343096; doi:10.1371/journal.pcbi.1002467), 2012-04-26

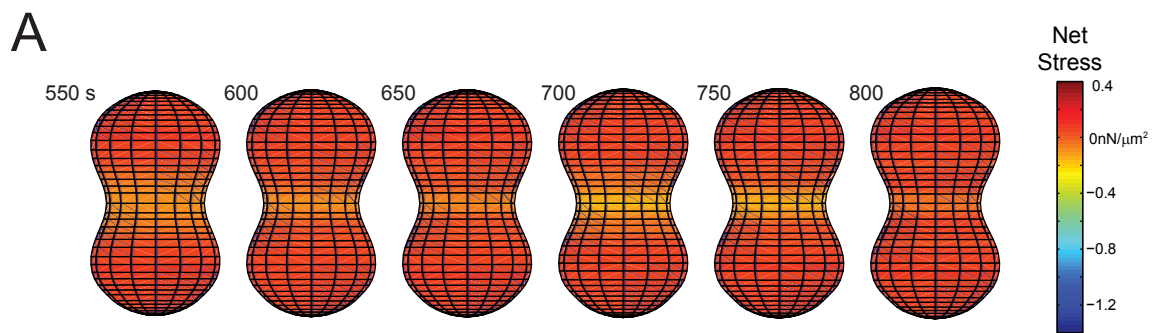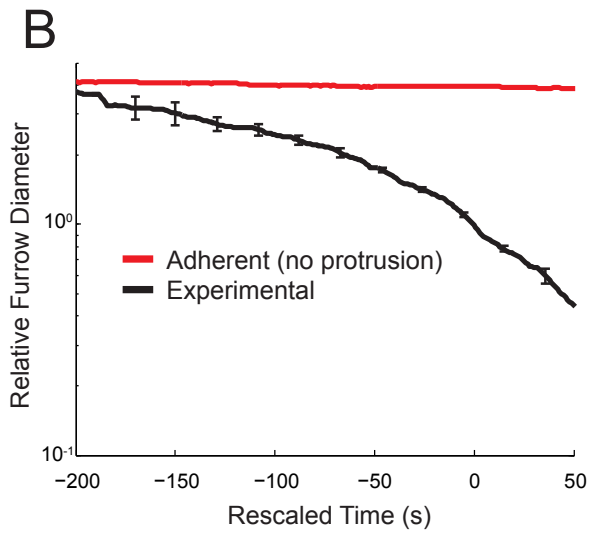

Supplement: pcbi.1002467.s002.pdf [file pcbi.1002467.s002.pdf]
